# Supplementary material for: New organic–inorganic hybrid materials: high refractive index polymers based on cyclotriphophazene with high thermostability and transparency
Source: Royal Society of Chemistry journal article supplement (doi:10.1039/d1qm00635e), 2021-01-01
Supplement: d1qm00635e1.pdf [file d1qm00635e1.pdf]

Supporting Information for  
New Organic-Inorganic Hybrid Materials: High  
Refractive Index Polymers Based on Cyclotriphosphazene  
with High Thermostability and Transparency

Linxuan Fang,<sup>a</sup> Caiyun Wang,<sup>a</sup> Menglu Dai,<sup>a</sup> Gang Huang,<sup>a</sup> Jing Sun,<sup>a, b\*</sup> and Qiang  
Fang<sup>a\*</sup>

<sup>a</sup>Key Laboratory of Synthetic and Self-Assembly Chemistry for Organic Functional  
Molecules, Center for Excellence in Molecular Synthesis, Shanghai Institute of  
Organic Chemistry, University of Chinese Academy of Sciences, Chinese Academy  
of Sciences, 345 Lingling Road, Shanghai 200032, P. R. China.

<sup>b</sup>CAS Key Laboratory of Energy Regulation Materials Shanghai Institute of Organic  
Chemistry, 345 Lingling Road, Shanghai 200032, P. R. China.

\*E-mail: [qiangfang@mail.sioc.ac.cn](mailto:qiangfang@mail.sioc.ac.cn)

E-mail: [sunjing@sioc.ac.cn](mailto:sunjing@sioc.ac.cn)

**This supplemental document contains 9 Figures over 7 pages.**

## Contents:

- **Characterizations**

**Fig. S1**  $^1\text{H}$  NMR spectrum of **CVP** (400 MHz,  $\text{CDCl}_3$ ).

**Fig. S2**  $^{31}\text{P}$  NMR (121 MHz,  $\text{CDCl}_3$ ) and  $^{13}\text{C}$  NMR (100 MHz,  $\text{CDCl}_3$ ) spectra of **CVP**.

**Fig. S3** DSC traces of **CVP-B** and **CVP-T** (10  $^\circ\text{C}/\text{min}$ , in  $\text{N}_2$ ).

**Fig. S4** TGA curves of **CVP-B** and **CVP-T** (10  $^\circ\text{C}/\text{min}$ , in  $\text{N}_2$ ).

**Fig. S5** XRD pattern spectra of free-standing films of **CVP-B** and **CVP-T**.

**Fig. S6** Variation coefficient of the **CVP-B** and **CVP-T** films.

**Fig. S7** Pictures of the contact angles of **CVP-B** and **CVP-T** films.

**Fig. S8** Transmittance of free-standing films of **CVP-B** and **CVP-T** after immersing in the water for 2 days.

**Fig. S9** Variation coefficient of **CVP-B** and **CVP-T** films after immersing in the water for 2 days.

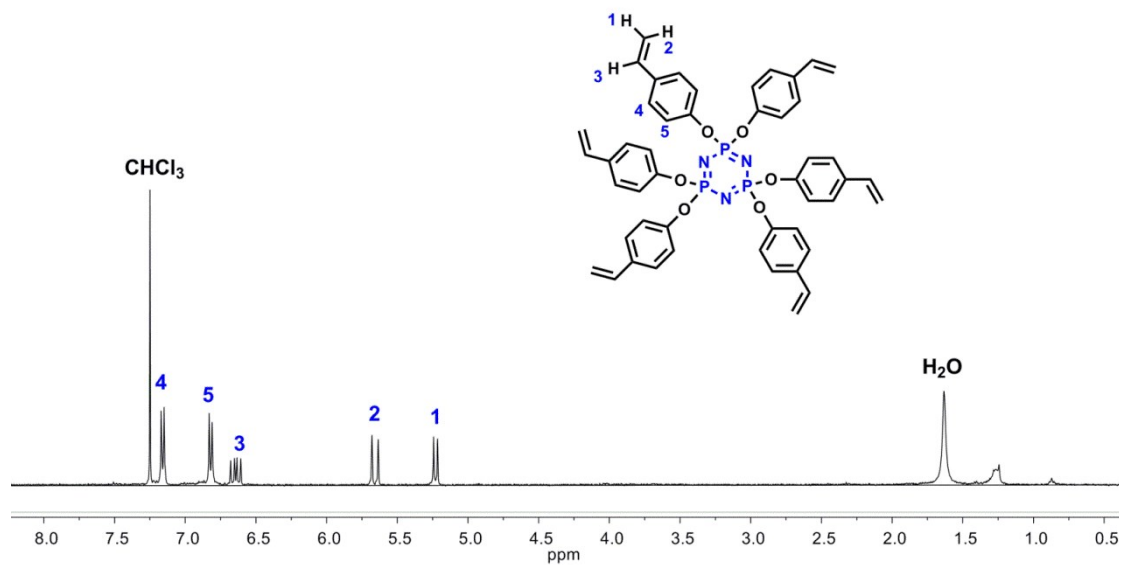

**Fig. S1**  $^1\text{H}$  NMR spectrum of CVP (400 MHz,  $\text{CDCl}_3$ ).

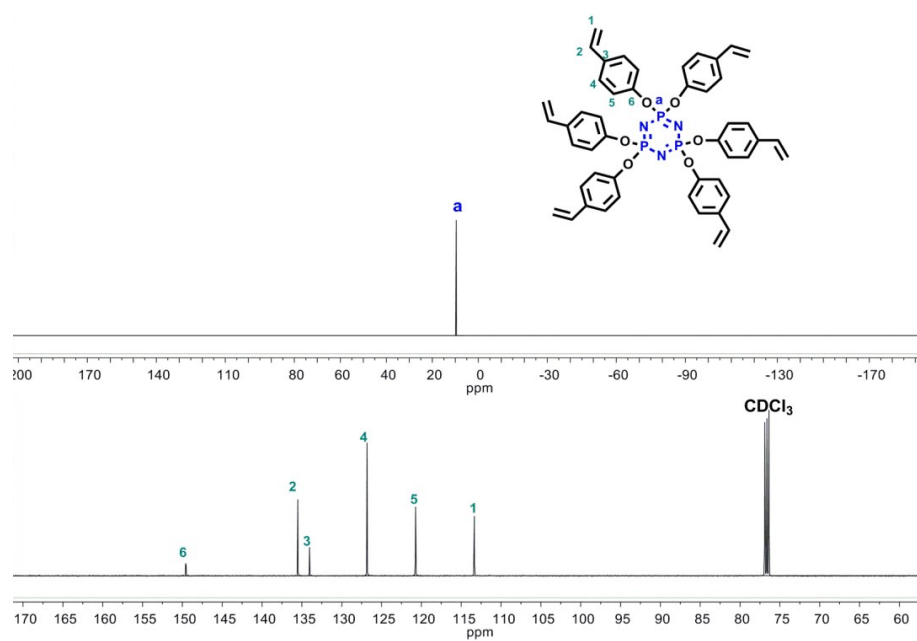

**Fig. S2**  $^{31}\text{P}$  NMR (121 MHz,  $\text{CDCl}_3$ ) and  $^{13}\text{C}$  NMR (100 MHz,  $\text{CDCl}_3$ ) spectra of CVP.

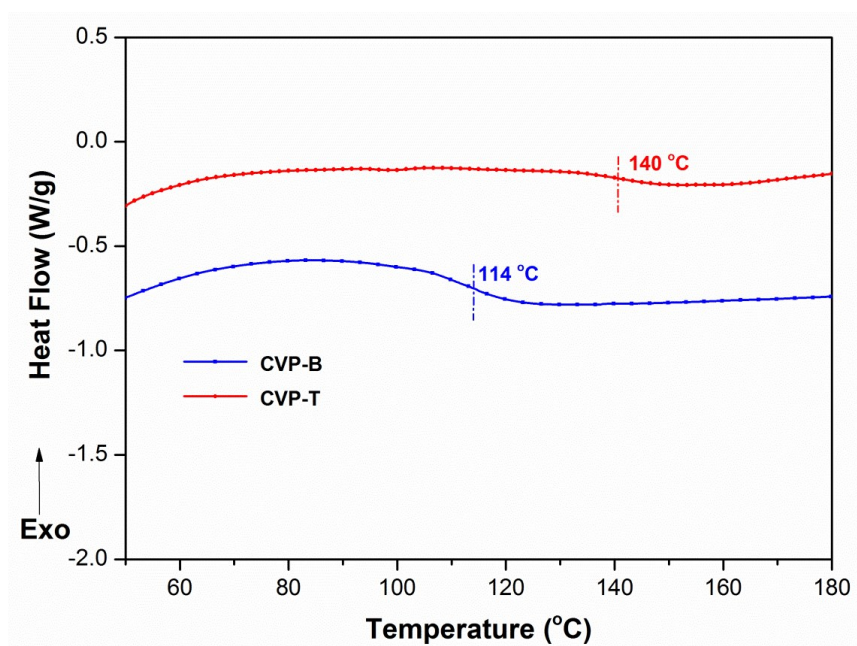

Fig. S3 DSC traces of CVP-B and CVP-T (10 °C/min, in N<sub>2</sub>).

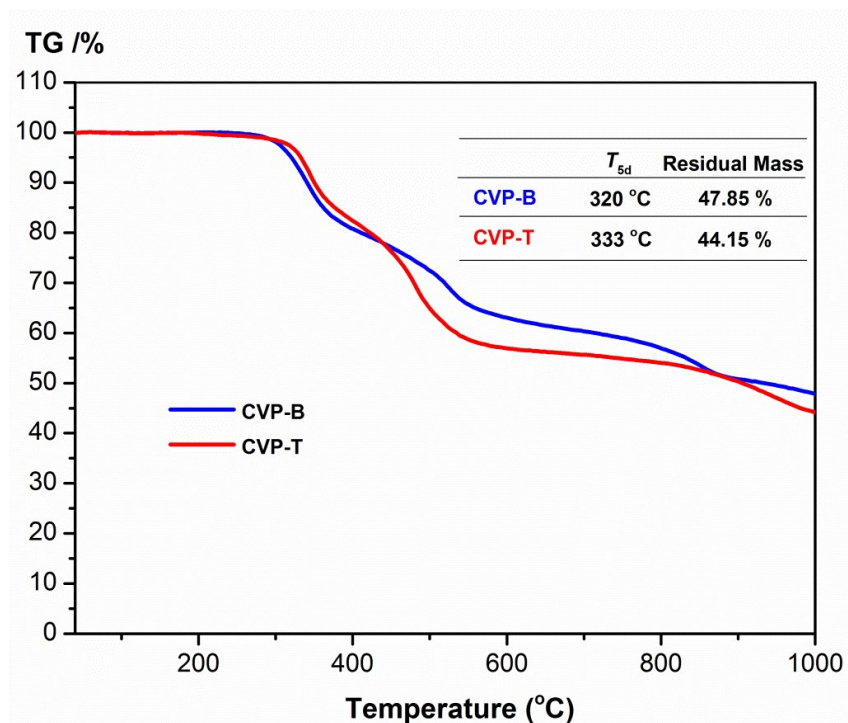

Fig. S4 TGA curves of CVP-B and CVP-T (10 °C/min, in N<sub>2</sub>).

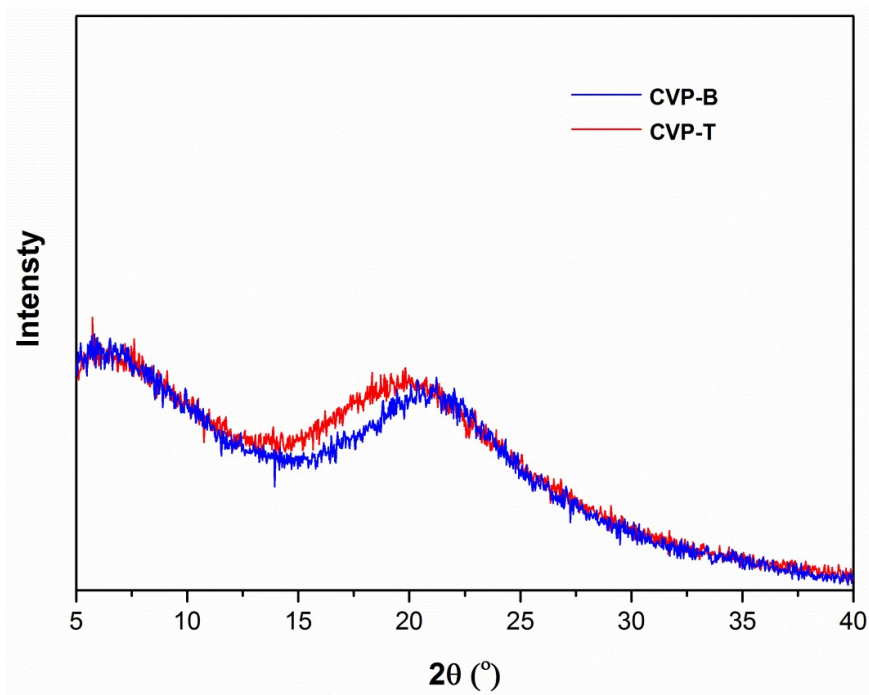

Fig. S5 XRD pattern spectra of free-standing films of **CVP-B** and **CVP-T**.

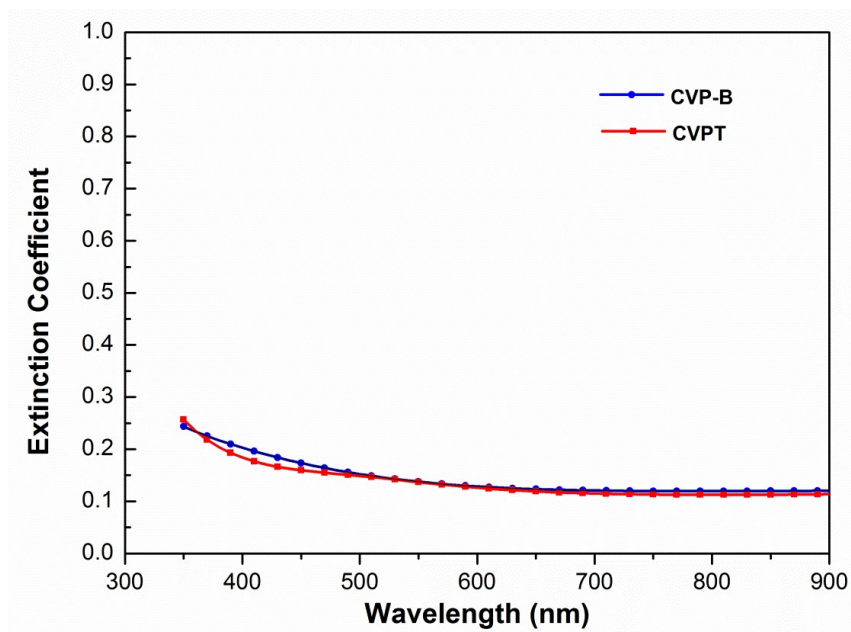

Fig. S6 Variation coefficient of the **CVP-B** and **CVP-T** films.

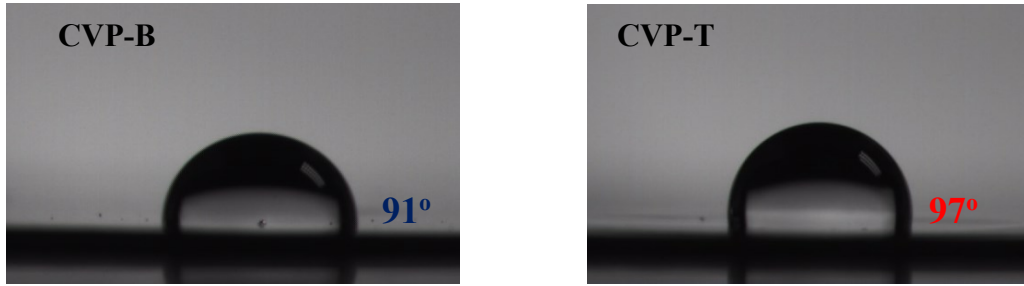

**Fig. S7** Pictures of the contact angles of **CVP-B** and **CVP-T** films.

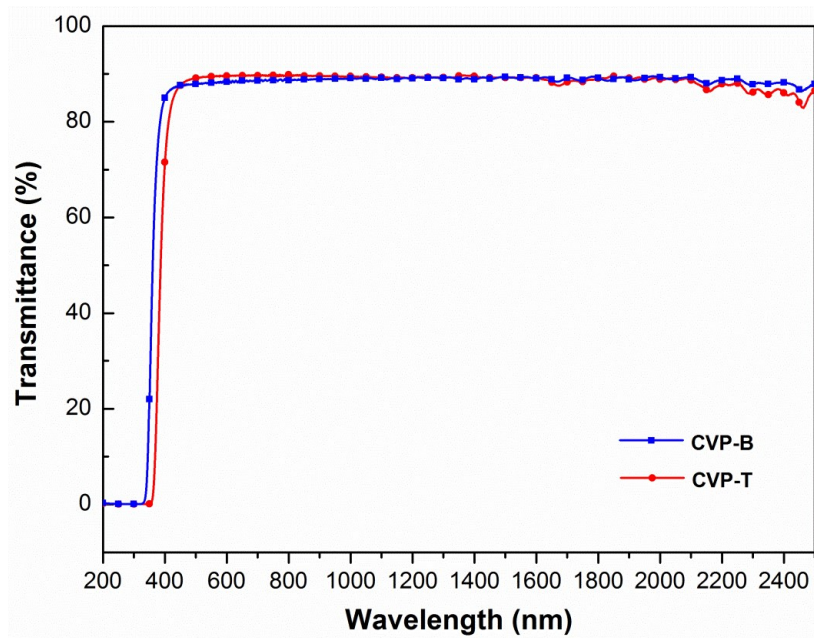

**Fig. S8** Transmittance of free-standing films of **CVP-B** and **CVP-T** after immersing in the water for 2 days.

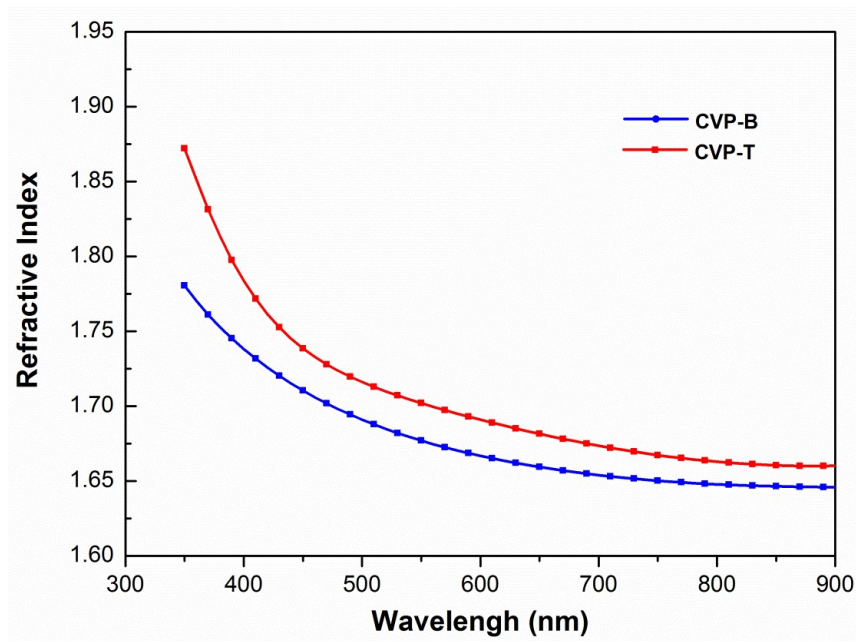

**Fig. S9** Variation coefficient of **CVP-B** and **CVP-T** films after immersing in the water for 2 days.
